# Supplementary material for: Virtual visiting in intensive care during the COVID-19 pandemic: a qualitative descriptive study with ICU clinicians and non-ICU family team liaison members
Source: HighWire-hosted journal article supplement (doi:10.1136/bmjopen-2021-055679), 2022-04-01
Supplement: bmjopen-2021-055679supp001_data_supplement.pdf [file bmjopen-2021-055679supp001_data_supplement.pdf]

### Interview Schedule

We are interested to find out about how family communication in ICU has changed during the Covid-19 pandemic. Particularly how this has affected health care professionals, patients and families. We are interested to hear about your experience.

#### Background

1. What is your usual role and where do you usually work?

Probe: Has your role or place of work changed because of COVID19?

2. How long have you worked in an ICU environment?

#### Family Communication

3. Tell me about your experience with communicating with families in ICU during visiting restrictions due to the COVID19 pandemic?

Probe: What is different? What is the same?

4a. What communication tools have you, or your ICU/team used to communicate with families?

4c. Which communication tools work well?

Probe: tell me why that is?

4c. Which communication tools work not so well?

Probe: tell me why that is?

5a. (If not specifically mentioned above)...Have you had the opportunity to use a Life Lines virtual visiting tablet?

Probe: If no, what prevented you from using it?

Probe: If yes what made it possible or easy for you to use?

5b. Which kind of situations and patients have you used a Life Lines tablet for?

5c. What do you like about Life Lines? What works well?

What do you not like? What works not so well?

6. Given what you have told me about your experience with communicating with families during Covid-19, what impact do you think it has had on your ability to support families while their loved one is critically ill?

Probe: How has this made you feel?

7. What impact do you think it has had on the care you are able to deliver to patients?

Probe: How has this made you feel?

8. Is there anything else you would like to share about family communication in the ICU during the Covid-19 pandemic?

# Life Lines Codebook – Interviews with clinicians

## Nodes

| Name                                 | Description                                                                                                                      | Files | References |
|--------------------------------------|----------------------------------------------------------------------------------------------------------------------------------|-------|------------|
| <b>a) Restoring the family unit</b>  | <b>Perceptions and experiences relating to virtual visits creating a sense of family unit.</b>                                   |       |            |
| • Connecting extended families       | Experiences of virtual visits with extended family units (>2 people).                                                            | 11    | 13         |
| • Family catch ups                   | Experiences of families using virtual visiting to connect with patients, giving family updates and chatting about everyday life. | 11    | 17         |
| • Contact from afar                  | Experiences of virtual visits when family members are afar.                                                                      | 9     | 16         |
| • Birthdays                          | Experiences of patients and families celebrating birthdays using virtual visiting.                                               | 6     | 6          |
| • Own language                       | Experiences of virtual visiting allowing patients to communicate in their own language with their family members.                | 5     | 5          |
| • Pets                               | Experiences of virtual visits including patients' pets.                                                                          | 2     | 2          |
| • Singing                            | Experiences of family members singing during virtual visits.                                                                     | 5     | 9          |
| <b>b) Family involvement in care</b> | <b>Virtual visiting allowing family members to be more involved in their loved one's care</b>                                    |       |            |
| • End of life                        | Examples of virtual visiting used for end-of-life conversations.                                                                 | 19    | 26         |
| • Rehabilitation                     | Using virtual visits for rehabilitation.                                                                                         | 8     | 17         |
| • Spiritual care                     | Using virtual visits for spiritual care.                                                                                         | 6     | 9          |
| • Orientation                        | Experiences of virtual visiting being used to help orient delirious patients.                                                    | 6     | 7          |
| • Clinical update                    | Perceptions and experiences of using virtual visiting for clinical updates.                                                      | 8     | 14         |
| <b>c) Sensemaking</b>                | <b>Virtual visits enabling family members make sense of the situation</b>                                                        |       |            |
| • Relief                             | Experiences of families feeling relief, reassurance and taking comfort from the virtual visit.                                   | 13    | 31         |
| • Receptiveness                      | Family members receptiveness to virtual visiting.                                                                                | 8     | 8          |
| • Emotionally challenging            | Examples of families finding visits emotionally challenging.                                                                     | 18    | 33         |
| • Processing                         | Family members processing information and visual cues from the virtual visit.                                                    | 15    | 29         |

| Name              | Description                                                                                | Files | References |
|-------------------|--------------------------------------------------------------------------------------------|-------|------------|
| • Family reaction | Experiences of different ways family members react to, and behave during, a virtual visit. | 7     | 17         |
